# Supplementary material for: QIAreach QuantiFERON-TB for the diagnosis of Mycobacterium tuberculosis infection
Source: PubMed Central journal article supplement — Eur Respir J. 2022 Mar 24;59(3):2102563. doi: 10.1183/13993003.02563-2021 (PMC8943267; doi:10.1183/13993003.02563-2021), 2022-03-24

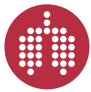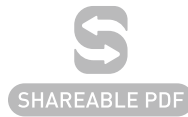

# QIAreach QuantiFERON-TB for the diagnosis of *Mycobacterium tuberculosis* infection

Francesca Saluzzo <sup>1,2</sup>, Paola Mantegani<sup>1,2</sup>, Valeria Poletti de Chaurand <sup>1</sup> and Daniela Maria Cirillo <sup>1</sup>

<sup>1</sup>Emerging Bacterial Pathogens Unit, Division of Immunology, Transplantation and Infectious Diseases, IRCCS San Raffaele Scientific Institute, Milan, Italy. <sup>2</sup>These authors contributed equally to this work.

Corresponding author: Daniela Maria Cirillo ([cirillo.daniela@hsr.it](mailto:cirillo.daniela@hsr.it))

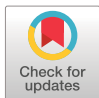

Shareable abstract (@ERSpublications)

**QIAreach QFT demonstrated a good performance in diagnosing TB infection. This tool may offer technical and operational benefits over more complex IGRA ELISA-based assays, granting timely TB diagnosis in decentralised settings with limited infrastructure.** <https://bit.ly/3n6Dxll>

**Cite this article as:** Saluzzo F, Mantegani P, Poletti de Chaurand V, *et al.* QIAreach QuantiFERON-TB for the diagnosis of *Mycobacterium tuberculosis* infection. *Eur Respir J* 2022; 59: 2102563 [DOI: 10.1183/13993003.02563-2021].

This single-page version can be shared freely online.

Copyright ©The authors 2022.

This version is distributed under the terms of the Creative Commons Attribution Non-Commercial Licence 4.0. For commercial reproduction rights and permissions contact [permissions@ersnet.org](mailto:permissions@ersnet.org)

This article has an editorial commentary:  
<https://doi.org/10.1183/13993003.00149-2022>

Received: 24 Sept 2021  
Accepted: 12 Oct 2021

*To the Editor:*

Timely diagnosis and treatment to prevent tuberculosis (TB) transmission and the consequent replenishment of the TB infection reservoir are essential for the control and elimination of TB worldwide [1], ultimately contributing the World Health Organization (WHO)'s End TB goals [2].

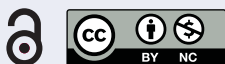

Supplement: ERJ-02563-2021.Shareable.pdf [file ERJ-02563-2021.Shareable.pdf]
